## **Facemask shortage and the novel coronavirus (2019-nCoV) outbreak: Reflection on public health measures**

Huailiang Wu<sup>1,2#</sup>, MBBS; Jian Huang<sup>3#</sup>, PhD, MPH; Casper J. P. Zhang<sup>4#</sup>, PhD, MPH; Zonglin He<sup>2</sup>, MBBS; Wai-Kit Ming<sup>1,2,5\*</sup>, MD, PhD, MPH, MMSc, EMBA

1.Department of Public Health and Preventive Medicine, School of Medicine, Jinan University, Guangzhou, China

2.International school, Jinan University, Guangzhou, China

3.MRC Centre for Environment and Health, Department of Epidemiology and Biostatistics, School of Public Health, St Mary's Campus, Imperial College London, Norfolk Place, London W2 1PG, United Kingdom

4.School of Public Health, LKS Faculty of Medicine, The University of Hong Kong, Hong Kong, China

5.HSBC Business School, Peking University, Shenzhen, China

# The authors contributed equally to this work

\*Corresponding author

Corresponding author: Dr. Wai-Kit Ming, MD, PhD, MPH, MMSc, EMBA

Associate Professor, Department of Public Health and Preventive Medicine, School of Medicine, Jinan University, Guangzhou, China

Assistant Dean, International School, Jinan University, Guangzhou, China

Email: [wkming@connect.hku.hk](mailto:wkming@connect.hku.hk)

Tel: +86 14715485116

### **Keyword**

Novel Coronavirus-Infected Pneumonia, NCP, 2019-nCoV, facemask shortage, public health intervention, health policy

## **Abstract**

### **Background**

To analyse the impact of the Novel Coronavirus Pneumonia (NCP) outbreak on the facemask shortage in China and provide insight into the development of emergency plans for future infectious disease outbreaks.

### **Methods**

Policy review using government websites and shortage analysis using mathematical modelling based on data obtained from the National Health Commission (NHC), the Ministry of Industry and Information Technology (MIIT), and the Center for Disease Control and Prevention (CDC) of the People's Republic of China.

### **Findings**

Supplies of facemasks in the whole of China would have been sufficient for both the healthcare workers and the general population if the NCP outbreak only occurred in Hubei province. However, if the outbreak occurred in both Hubei and Guangdong provinces, facemask supplies in the whole of China could last for 34 days if no alternative public health intervention was introduced. There would be a shortage of 480 million facemasks by mid-February 2020. If the outbreak occurred in the whole of China, facemask supplies could only last for 16 days and the shortage would considerably worsen, with a shortage of 11.5 billion facemasks by mid-February 2020.

### **Interpretation**

In light of the novel coronavirus outbreak in China, insufficient medical resources (e.g., shortage of facemasks) can considerably compromise the efficacy of public health measures. An effective public health intervention should also consider the adequacy and affordability of existing medical resources. Global collaboration should be strengthened to prevent the development of a global pandemic from a regional epidemic via easing the medical resources crisis in the affected countries.

## Introduction

An increasing number of novel coronavirus (2019-nCoV) pneumonia cases were initially identified in Wuhan, Hubei province, China in December 2019. The Novel Coronavirus Pneumonia (NCP) was mainly transmitted via respiratory droplets and can be transmitted between humans<sup>1-3</sup>. Common symptoms include fever, cough, dyspnoea, and myalgia or fatigue while less common symptoms include sputum production, headache, haemoptysis, and diarrhoea<sup>4</sup>. In the early February 2020, the reported incidence of NCP cases exceeded 40,000 in China, of which more than 70% was in Hubei province<sup>5,6</sup>. Globally, Thailand, Japan, South Korea, Singapore, Malaysia, France, Canada, Australia, Germany, the United Kingdom, the United States and 12 other countries had reported cases infected by 2019-nCoV<sup>7</sup>. Most of the confirmed cases are travellers from or ever been to Wuhan or other Chinese cities; however, locally transmitted cases outside of China have also been reported<sup>6</sup>.

The World Health Organization's (WHO) guidance on prevention and control of the NCP outbreak recommends hand and respiratory hygiene and the use of appropriate personal protective equipment for healthcare workers in practice and patients with suspected 2019-nCoV infection should be offered a medical mask<sup>8</sup>. Regarding the respiratory hygiene measures, facemask wearing has been considered as one of the most cost-effective and important measures to prevent the NCP infection, but it has become a social concern due to the recent facemask shortage in China<sup>9-11</sup>.

In the past few years, China had been the major facemask producer in the world, contributing to 50% of the global production<sup>9</sup>. At the usual time, China can produce about 20 million facemasks per day while the productivity during the Chinese New Year holiday was lower (12 million facemasks per day)<sup>12</sup>. However, even if the full productivity could be achieved, 20 million facemasks per day do not seem to meet the need of a population of 1.4 billion in China. Thus, between 24 Jan and 30 Jan, the Chinese government imported more than 56 million facemasks<sup>12</sup>. To control the NCP epidemic, the Chinese government also extended the Chinese New Year holiday to allow for home quarantine and reduce the need for facemasks and other medical resources.

In this study, we simulated the facemask availability during the NCP outbreak using a mathematical model based on the actual development of the outbreak and public health intervention introduced by the Chinese government. We aim to investigate the situation of the facemask shortage and provide insight into the development of emergency plans for future infectious disease outbreaks.

## **Method**

### *Data source*

We summarized the public health intervention introduced by the Chinese government during the NCP outbreak based on the official announcements and documents from the National Health Commission (NHC), the Ministry of Industry and Information Technology (MIIT), and the Center for Disease Control and Prevention (CDC) of the People's Republic of China.

We predicted the facemask availability in China during the NCP outbreak using a mathematical model based on data and assumptions on the production, import, consumption. We considered three scenarios in which the NCP outbreak occurred in 1) Hubei province (the most severe epidemic area); 2) Hubei and Guangdong provinces (the two provinces with the highest numbers of cases); and 3) the whole of China (all regions of China have reported confirmed cases)<sup>2,7</sup>. Our prediction covered the period from 31 Dec 2019 to 15 Feb 2020 (47 days in total) because a cluster of NCP cases was reported by the Wuhan NHC in late Dec 2019<sup>1</sup> and the peak of the epidemic has been predicted to be between early- and mid-February<sup>13</sup>. The parameters included in our model were estimated based on the data released by the NHC, MIIT, and CDC of the People's Republic of China, China Health Statistics Yearbook 2019, or recent investigation on the outbreak (Table 1). Specifically, the population and the numbers of healthcare workers in China, Hubei province, and Guangdong province were obtained from the China Health Statistics Yearbook 2019<sup>14</sup>. Based on the data from NHC, MIIT, and CDC of the People's Republic of China, we estimated the facemask productivity, import, and consumption during this outbreak.

### Facemask availability

We simulated the daily availability of facemasks during the prediction period using equation (1),

$$F_a(d) = F_a(d-1) + F_p(d) + F_i(d) - F_c(d), \text{ for } d = 1 \text{ to } 47 \quad (1)$$

where  $F_a(d)$  is the availability of facemasks on day  $d$ , as defined as the total number of facemasks on the market and in storage on day  $d$ .  $F_p(d)$  is the number of facemasks produced in China on day  $d$ .  $F_i(d)$  is the number of facemasks being imported to China on day  $d$ .  $F_c(d)$  is the consumption of facemasks on day  $d$ . Equation 1 can be derived into equation (2),

$$F_a(d) = F_a(0) + \sum_{x=1}^d F_p(x) + \sum_{x=1}^d F_i(x) - \sum_{x=1}^d F_c(x), \text{ for } d = 1 \text{ to } 47 \quad (2)$$

where  $F_a(0)$  is the baseline facemask availability at the beginning of our prediction period. The summation function  $\sum_{x=1}^d F_p(x)$ ,  $\sum_{x=1}^d F_i(x)$ , and  $\sum_{x=1}^d F_c(x)$  are the total numbers of facemasks produced in, imported to and consumed in China on from day 1 to day  $d$ , respectively.

We estimated the daily consumption of facemasks using equations (3) to (4),

$$F_c(d) = F_{c,h}(d) + F_{c,p}(d) \quad (3)$$

$$F_{c,h}(d) = \alpha \times N_h \quad (4)$$

$$F_{c,p}(d) = \beta \times N_p \times R(d) \quad (5)$$

where  $F_{c,h}(d)$  and  $F_{c,p}(d)$  are the numbers of facemasks used by healthcare workers and the general population on day  $d$  in the disease epidemic region, respectively.  $\alpha$  and  $\beta$  are the daily numbers of facemasks used by one healthcare worker and one person in the general population, respectively, in the disease epidemic region.  $N_h$  and  $N_p$  are the numbers of healthcare workers and the general population in the disease epidemic region, respectively.  $R(d)$  is the percentage of general population in the disease epidemic region wearing facemasks on day  $d$ .

### Model assumptions

Model input and assumptions in our model are summarized in Table 1. MIIT estimated that the amount of usual daily facemask production was 20 million<sup>12</sup>. Facemask storage was estimated to be seven times of the daily consumption in hospitals<sup>9</sup>. We assume that the 70% of the facemask storage in the whole of China would be supplied to the hospital system; thus, the baseline availability of facemasks

(i.e.,  $F_a(0)$ ) was estimated to be 246,006,500, which is about 12 times of the usual daily facemask production in China. In our model, we assumed all facemasks on the market and in storage are available for consumption. In other word, we did not take into account factors that may limit the supply on the market, such as logistics. We assumed that the number of facemasks produced in China each day during the prediction period (i.e.,  $F_p(d)$ ) to be 20,000,000<sup>12</sup> ( $0 < d \leq 24$ ), 8,000,000<sup>9</sup> ( $24 < d \leq 33$ ), 12,000,000<sup>12</sup> ( $33 < d \leq 41$ ), and 20,000,000<sup>12</sup> ( $41 < d \leq 47$ ). We also assumed that the number of facemasks imported to China on each day during the prediction period (i.e.,  $F_i(d)$ ) to be 6,000,000 ( $25 \leq d \leq 30$ ) and 20,000,000 ( $d = 31$ )<sup>12</sup>. Considering one facemask should be replaced every 3-4 hours and one shift for the healthcare workers is about 8-10 hours at the usual time, we assumed that each healthcare worker would use two facemasks each day ( $\alpha$ ). And we assumed that each person in the general population would use one facemask each day ( $\beta$ ), given that healthcare workers are more aware of respiratory hygiene compared to the general population. We assumed the percentage of population wearing facemasks ( $R(d)$ ) to be close to 0% before the release of the national technical protocol for 2019-nCoV (the first version) by the NHC (i.e.,  $0 < d \leq 16$ )<sup>2</sup>. The  $R(d)$  was assumed to be 20% after the recommendation of facemasks wearing by the NHC ( $16 < d \leq 23$ ), and 60% after the release of the national technical protocol for 2019-nCoV (the second version) and massive media cover ( $23 < d \leq 25$ )<sup>15</sup>. The Chinese New Year holiday started on 24 Jan 2020 and the Chinese government suggested home quarantine for suspected cases and reducing gathering during the holiday; thus, we assumed the  $R(d)$  to be 20% from 24 Jan 2020 to 9 Feb 2020 ( $25 < d \leq 41$ ). For most of workers, they will need to start working on 10 Feb 2020 while students don't need to go to schools until 24 Feb 2020; thus, we assumed the  $R(d)$  to be 40% from 10 Feb 2020 to 15 Feb 2020 ( $41 < d \leq 47$ ).

Table 1. Parameters for estimating the facemask availability during the Novel Coronavirus Pneumonia (NCP) outbreak in China.

| Parameter | Definition                                                                        | Estimation                                                                                                                                                                                                                                                                                                                | Model input                                                                                                                                        |
|-----------|-----------------------------------------------------------------------------------|---------------------------------------------------------------------------------------------------------------------------------------------------------------------------------------------------------------------------------------------------------------------------------------------------------------------------|----------------------------------------------------------------------------------------------------------------------------------------------------|
| $N_{p,c}$ | Population of mainland China                                                      | $N_{p,c} = 1,395,380,000^{14}$                                                                                                                                                                                                                                                                                            | 1,395,380,000                                                                                                                                      |
| $N_{p,h}$ | Population of Hubei province                                                      | $N_{p,h} = 59,170,000^{14}$                                                                                                                                                                                                                                                                                               | 59,170,000                                                                                                                                         |
| $N_{p,g}$ | Population of Guangdong province                                                  | $N_{p,g} = 113,460,000^{14}$                                                                                                                                                                                                                                                                                              | 113,460,000                                                                                                                                        |
| $N_{h,c}$ | Number of healthcare workers in mainland China                                    | $N_{h,c} = 12,300,325^{14}$                                                                                                                                                                                                                                                                                               | 12,300,325                                                                                                                                         |
| $N_{h,h}$ | Number of healthcare workers in Hubei province                                    | $N_{h,h} = 521,930^{14}$                                                                                                                                                                                                                                                                                                  | 521,930                                                                                                                                            |
| $N_{h,g}$ | Number of healthcare workers in Guangdong province                                | $N_{h,g} = 918,396^{14}$                                                                                                                                                                                                                                                                                                  | 918,396                                                                                                                                            |
| $R(d)$    | Percentage of population using facemasks on day $d$                               | Assuming the $R(d)$ to be close to be 0% (between 31 Dec 2019 and 15 Jan 2020), 20% (between 16 Jan 2020 and 22 Jan 2020), 60% (between 23 Jan 2020 and 24 Jan 2020) and 20% (between 25 Jan 2020 and 9 Feb 2020), and 40% (between 10 Feb 2020 and 15 Feb 2020 )                                                         | 0% ( $0 < d \leq 16$ ), 20% ( $16 < d \leq 23$ ), 60% ( $23 < d \leq 25$ ), 20% ( $25 < d \leq 41$ ), and 40% ( $41 < d \leq 47$ )                 |
| $\alpha$  | Number of facemasks consumption of each healthcare worker each day                | Assuming that each healthcare workers would use two facemasks each day                                                                                                                                                                                                                                                    | 2                                                                                                                                                  |
| $\beta$   | Number of facemasks consumption of each person in the general population each day | Assuming that each person in the general population would use one facemask each day                                                                                                                                                                                                                                       | 1                                                                                                                                                  |
| $F_p(d)$  | Number of facemasks produced in China on day $d$                                  | Assuming $F_p(d) = 20,000,000$ (between 31 Dec 2019 and 23 Jan 2020), $8,000,000^9$ (between 24 Jan 2020 and 1 Feb 2020), $12,000,000^{12}$ (between 2 Feb 2020 and 9 Feb 2020) per day, and $20,000,000$ (between 10 Feb 2020 and 15 Feb 2020)                                                                           | $20,000,000$ ( $0 < d \leq 24$ ), $8,000,000^8$ ( $24 < d \leq 33$ ), $12,000,000^{11}$ ( $33 < d \leq 41$ ) and $20,000,000$ ( $41 < d \leq 47$ ) |
| $F_i(d)$  | Number of facemasks imported to China on day $d$                                  | From 24 Jan 2020 to 30 Jan 2020, more than 56 million facemasks were imported <sup>12</sup> . Estimated $F_i(d) = 6,000,000$ per day from 24 Jan 2020 to 29 Jan 2020 or $20,000,000$ per day on 30 Jan 2020. From 31 Dec 2019 to 23 Jan 2020, and from 31 Jan 2020 to 15 Feb 2020 we estimated $F_i(d)$ to be close to 0. | 0 ( $0 < d < 25$ , $31 < d \leq 47$ ), $6,000,000$ ( $25 \leq d \leq 30$ ), and $20,000,000$ ( $d = 31$ )                                          |
| $F_a(0)$  | Number of facemasks available in the whole of China on 30 Dec 2010                | Facemask storage was estimated to be seven times of the daily consumption in hospitals <sup>9</sup> . We assume that the 70% of the facemask storage in the whole of China would be supplied to the hospital system; thus, $F_a(0) = 7 \times \alpha \times N_{h,c} / 70\% = 172,204,550 / 70\% = 246,006,500$            | 246,006,500                                                                                                                                        |

## Results

Figure 1 shows the cumulative numbers of confirmed cases and deaths of the NCP and the public health intervention introduced by the Chinese government from 31 Dec 2019 to 9 Feb 2020, e.g., identification of pathogen, activation of different levels of emergency response, announcement of protocols and guidelines for healthcare workers and the general population to follow, legislation facemask wearing in public, and lockdown of about 13 cities in Hubei province. From municipal level, provincial level, to national level, the Chinese government had implemented various strategies to control and prevent the spread of NCP.

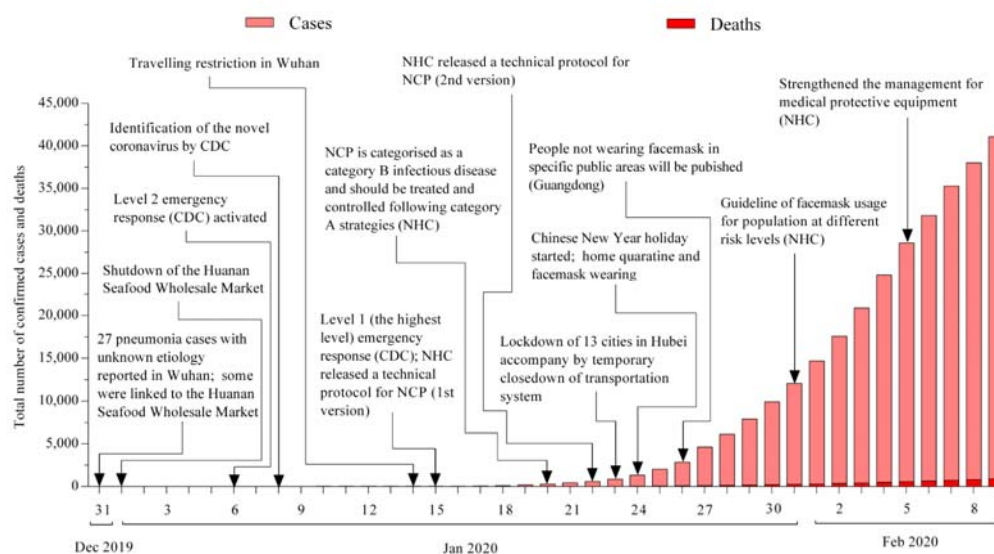

Figure 1. Timeline of public health intervention during the Novel Coronavirus Pneumonia (NCP) outbreak in China. (Publicly available data from official websites of the National Health Commission (NHC), the Ministry of Industry and Information Technology (MIIT), and the Center for Disease Control and Prevention (CDC) of the People's Republic of China.)

Figure 2 shows our prediction of the facemask availability during the NCP outbreak. Specifically, if the NCP outbreak only occurred in Hubei province (Scenario 1), the supplies of facemasks in the whole of China would have been sufficient for the daily consumption in this region. However, if the NCP



outbreak occurred in Hubei and Guangdong provinces (Scenario 2), facemasks available in the whole of China could supply these two provinces for about 34 days (from 31 Dec 2019 to 1 Feb 2020) with the implementation of existing public health intervention. After the release of the first NHC technical protocol on 15 Jan 2020, we estimated the duration of sufficient facemask supplies in this scenario would be 18 days. By mid-February, there would be a shortage of about 480 million facemasks in these provinces. In Scenario 3, in which we assumed the NCP outbreak occurred in the whole of China, facemasks supplies could only last for about 16 days (from 31 Dec 2019 to 16 Jan 2020). The shortage would appear only one day after the release of the first NHC technical protocol. By mid-February, there would be a shortage of approximate 11.5 billion facemasks in China.

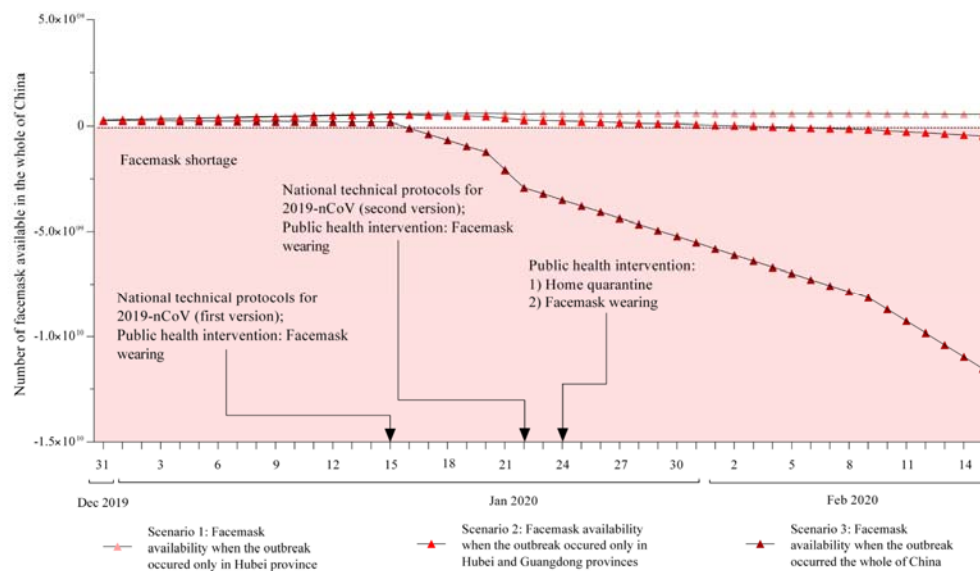

Figure 2. Facemask availability during the Novel Coronavirus Pneumonia (NCP) outbreak in China.

## Discussion

In this study, we summarized the public health intervention introduced by the Chinese government during the NCP outbreak and simulated the facemask shortage in three scenarios. Our results suggested that if the NCP outbreak only occurred in Hubei province, a facemask shortage would not have happened. However, if the outbreak spreads to Guangdong province or even the whole of China, a

shortage of facemask would appear in less than a month and could be substantial assuming the current public health intervention being maintained and no additional intervention.

Since the outbreak of Severe Acute Respiratory Syndrome (SARS) and H7N9 in the early 21<sup>st</sup> century, China has established and strengthened local and national emergency response systems and collaborations with WHO and international scientific communities<sup>16</sup>. Chinese government has taken rapid and various actions to control the NCP outbreak, such as lockdown of cities, temporary shutdown of the transportation system, and legislation on mandatory facemasks wearing in public<sup>17</sup>. However, the controlling a novel infectious disease outbreak can still be challenging. Research on infectious disease epidemic has been focusing mostly on predicting diseases spread and determining original infection source, and public health intervention to reduce transmission<sup>18-21</sup>, while studies investigating the burden on medical resources are lacking. Our findings showed that facemask shortage is very likely to occur when a novel infectious diseases outbreak occurred in a wide range of areas in China. A full daily productivity of facemasks cannot meet the needs of the huge population if the outbreak occurred in Hubei and Guangdong provinces. If the outbreak spreads to the whole of China, the facemask shortage would not relieve in a short time even by importing globally and increasing productivity, which can lead to panic buying<sup>22</sup>. Therefore, governments should consider the productivity, import, and storage of facemasks when planning for public health intervention, so as to maintain the availability and affordability of facemasks on the market. In addition, the need for other medical supplies, such as medical protective textiles and home-use disinfectant, could increase if the epidemic did not fade out. Meanwhile, timely and effective communication with the public is essential to mitigate social anxiety and panic buying, and alternative public health intervention are necessary, such as transport shutdown, school closure, and arrangement for effective home quarantine<sup>10,22,23</sup>.

Although our analysis was based on the NCP outbreak in China, infectious disease outbreak could occur in other countries as well. Lessons could be learned from the experience during the NCP outbreak in China (Table 2). Government in each country should revisit their emergency response plan for controlling infectious disease outbreak in the local context. To avoid massive shortage of medical resources, the supply and demand should be closely monitored, and a certain amount of storage based on past experience should be maintained. The emergency plan should also include strategies to increase

supply (production and import) and reduce demand during the critical period. In order to prevent the development of a global pandemic from a regional epidemic, a global collaboration to ease the medical resources crisis in the affected countries during an infectious disease outbreak should be established. With the shared information within the collaborated countries, the WHO could evaluate the severity of the outbreak and the availability of medical resources. Timely actions, such as increasing global productivity and distributing global storage, could be taken to minimize the risk of shortage.

Table 2. Summary of recommendations to governments (national level) and the World Health Organization (WHO) (international level).

| <b>Recommendations</b>            |                                                                                                                                                                |
|-----------------------------------|----------------------------------------------------------------------------------------------------------------------------------------------------------------|
| <b>National<br/>(governments)</b> | <b>level</b> <i>Before infectious disease outbreak</i>                                                                                                         |
|                                   | 1. Revisit emergency response plans for controlling infectious disease outbreak to include strategies to confront medical resource crisis during the outbreak; |
|                                   | 2. Maintain a certain amount of medical resources storage based on past experience.                                                                            |
|                                   | <i>During infectious disease outbreak</i>                                                                                                                      |
|                                   | 1. Closely monitor the supply of and demand for medical resources;                                                                                             |
|                                   | 2. Timely response to the increasing demand for medical resources by increasing productivity and import;                                                       |
|                                   | 3. Implement alternative public health measures such as transport shutdown, school closure, and arrangement for effective home quarantine.                     |
| <b>International<br/>(WHO)</b>    | <b>level</b> <i>Before infectious disease outbreak</i>                                                                                                         |
|                                   | 1. Strengthen global collaboration for confronting medical resource crisis during the outbreak.                                                                |
|                                   | <i>During infectious disease outbreak</i>                                                                                                                      |
|                                   | 1. Evaluate the severity of the local outbreak and prevent it from developing global outbreak;                                                                 |
|                                   | 2. Evaluate the availability of medical resources in the global collaborative network and assist the epidemic area to maintain a sufficient supply;            |
|                                   | 3. Give recommendation for global supply and demand if an international medical resource crisis is anticipated.                                                |

### **Strengths and Limitations**

To the best of our knowledge, this is the first study to investigate the facemask availability during the NCP outbreak in China. We have summarized in detail the management strategies implemented by the

Chinese governments and considered three scenarios for the outbreak development. Nevertheless, there are some limitations in this study. First, our estimation relied on the assumption of the effectiveness of public health intervention which was limited by the data availability during the outbreak. Our assumption that each healthcare worker would consume two facemasks per day ( $\alpha$ ) was conservative. In the early stage of the outbreak, facemask supplies were sufficient and healthcare workers could have used several facemasks each day for better protection. Second, we did not take into account logistics cost that could limit the supplies on the markets. Thus, our analysis is likely to underestimate the severity of the facemask shortage experiencing by the healthcare workers and the general population. Third, we didn't consider the types of facemasks that should be used by individuals at different risk levels<sup>24</sup>. Considering the gap between the production of surgical masks, KN95/N95 respirators and medical protective masks (totally 2,200,000<sup>12</sup> per day) and the number of healthcare workers (about 12 million in 2018<sup>14</sup>) in China, the MIIT suggested to reserve as many as the KN95/N95 respirators and medical protective masks for frontline healthcare workers<sup>25</sup>. The situation of facemasks shortage might be more severe when considering the demand for different types of facemasks from healthcare workers and the general population. Fourth, our prediction ended in mid-February considering the epidemic peak was predicted to be at about the same time<sup>13</sup>. However, if the transmissibility of the epidemic could be reduced, the peak would be delayed<sup>26</sup>, the daily incidence and the demand for facemasks and other medical supplies would also decrease. Nevertheless, the anxiety in the population may result in a constant demand for facemasks even when the epidemic is under controlled.

### **Conclusion and policy implication**

In light of the novel coronavirus outbreak in China, insufficient medical resources (e.g., shortage of facemasks) can considerably compromise the efficacy of public health measures. An effective public health intervention should also consider the adequacy and affordability of existing medical resources. Governments across the world should revisit their emergency response plans for controlling infectious disease outbreaks so as to avoid medical resource crisis. Global collaboration should be strengthened to prevent the development of a global pandemic from a regional epidemic via easing the medical resources crisis in the affected countries.

### **Declaration of interests**

No conflicts of interest

#### **Data sharing statement**

All data used in this study are publicly available. Data sources are described in the method section.

#### **Funding of source**

No funding in this study

#### **Contributor statement**

| <b>Author</b>         | <b>Contribution</b>                                                                                                                                                               |
|-----------------------|-----------------------------------------------------------------------------------------------------------------------------------------------------------------------------------|
| Dr Huailiang Wu       | 1. Analysed and interpreted the data;<br>2. Visualizing the results;<br>3. Drafted the manuscript;<br>4. Revised the manuscript.                                                  |
| Dr Jian Huang         | 1. Interpreted the data;<br>2. Reviewed the manuscript for intellectual content<br>3. Revised the manuscript.                                                                     |
| Dr Casper J. P. Zhang | 1. Reviewed the manuscript for intellectual content<br>2. Revised the manuscript                                                                                                  |
| Dr Zonglin He         | 1. Project administration<br>2. Data curation                                                                                                                                     |
| Dr Wai-Kit Ming       | 1. Designed and conceptualized study;<br>2. Interpreted the data;<br>3. Reviewed the manuscript for intellectual content<br>4. Responsible for the overall content as a guarantor |

## Reference

1. Nishiura H, Jung SM, Linton NM, et al. The Extent of Transmission of Novel Coronavirus in Wuhan, China, 2020. *J Clin Med* 2020; **9**(2).
2. Li Q, Guan X, Wu P, et al. Early Transmission Dynamics in Wuhan, China, of Novel Coronavirus-Infected Pneumonia. *N Engl J Med* 2020.
3. Cui J, Li F, Shi ZL. Origin and evolution of pathogenic coronaviruses. *Nat Rev Microbiol* 2019; **17**(3): 181-92.
4. Huang C, Wang Y, Li X, et al. Clinical features of patients infected with 2019 novel coronavirus in Wuhan, China. *Lancet* 2020.
5. Wuhan Municipal Health Commission. Wuhan Municipal Health Commission briefing on the pneumonia epidemic situation, 9 February 2020 (in Chinese). 2020. [http://wjw.hubei.gov.cn/fbjd/dtyw/202002/t20200210\\_2022514.shtml](http://wjw.hubei.gov.cn/fbjd/dtyw/202002/t20200210_2022514.shtml) (accessed 10 Feb 2020).
6. National Health Commission of the People 's Republic of China. Updates on pneumonia of new coronavirus infections as of February 9, 2020 (in Chinese). 2020. <http://www.nhc.gov.cn/xcs/yqfkd/202002/167a0e01b2d24274b03b2ca961107929.shtml> (accessed 10 Feb 2020).
7. World Health Organization. Novel Coronavirus (2019-nCoV) Situation Report - 13, 2020. 2020. <https://www.who.int/docs/default-source/coronaviruse/situation-reports/20200202-sitrep-13-ncov-v3.pdf> (accessed 7 Feb 2020).
8. World Health Organization. Infection prevention and control during health care when novel coronavirus (nCoV) infection is suspected. 2020. [https://www.who.int/publications-detail/infection-prevention-and-control-during-health-care-when-novel-coronavirus-\(ncov\)-infection-is-suspected-20200125](https://www.who.int/publications-detail/infection-prevention-and-control-during-health-care-when-novel-coronavirus-(ncov)-infection-is-suspected-20200125) (accessed 7 Feb 2020).
9. Ministry of Industry and Information Technology of People 's Republic of China. Facemasks shortage? Just now, the Ministry of Industry and Information Technology of People 's Republic of China responded (in Chinese). 2020. <http://www.miit.gov.cn/n973401/n7647394/n7647409/c7656383/content.html> (accessed 7 Feb 2020).
10. Ming W, Huang J, Zhang C. Breaking down of the healthcare system: Mathematical modelling for controlling the novel coronavirus (2019-nCoV) outbreak in Wuhan, China. *bioRxiv* 2020.

11. Jefferson T, Del Mar C, Dooley L, et al. Physical interventions to interrupt or reduce the spread of respiratory viruses: systematic review. *BMJ* 2009; **339**: b3675.
12. Ministry of Industry and Information Technology of People 's Republic of China. Press conference on the situation of medical protective equipment during the outbreak of 2019-nCoV pneumonia (in Chinese). 2020. <http://www.miit.gov.cn/n1146290/n1146402/c7660995/content.html> (accessed 7 Feb 2020).
13. Chinanews.com. Feb 21 maybe peak day for coronavirus outbreak: Yale expert. . 2020. <http://www.ecns.cn/news/2020-02-04/detail-iftzewca0596265.shtml> (accessed 7 Feb 2020).
14. National Health Commission of the People 's Republic of China. Chinese Health Statistics Yearbook (2019 version) (in Chinese). China; 2019.
15. National Health Commission of the People 's Republic of China. The protocol for the novel coronavirus pneumonia (the second version) (in Chinese). 2020. <http://www.nhc.gov.cn/jkj/s3577/202001/c67cfe29ecf1470e8c7fc47d3b751e88.shtml> (accessed 7 Feb 2020).
16. Qiu W, Chu C, Mao A, Wu J. Studying Communication Problems for Emergency Management of SARS and H7N9 in China. *J Glob Infect Dis* 2018; **10**(4): 177-81.
17. World Health Organization. WHO, China leaders discuss next steps in battle against coronavirus outbreak. 2020. <https://www.who.int/news-room/detail/28-01-2020-who-china-leaders-discuss-next-steps-in-battle-against-coronavirus-outbreak> (accessed 7 Feb 2020).
18. Lipsitch M, Cohen T, Cooper B, et al. Transmission dynamics and control of severe acute respiratory syndrome. *Science* 2003; **300**(5627): 1966-70.
19. Riley S, Fraser C, Donnelly CA, et al. Transmission dynamics of the etiological agent of SARS in Hong Kong: impact of public health interventions. *Science* 2003; **300**(5627): 1961-6.
20. Zhang J, Jin Z, Sun GQ, Sun XD, Wang YM, Huang B. Determination of original infection source of H7N9 avian influenza by dynamical model. *Sci Rep* 2014; **4**: 4846.
21. Roberts MG. Modelling strategies for minimizing the impact of an imported exotic infection. *Proc Biol Sci* 2004; **271**(1555): 2411-5.

22. CNBC. Panic buying of face masks is unwarranted and could pose risks for health workers, experts say. 2020. <https://www.cnbc.com/2020/01/31/china-coronavirus-shortage-of-face-masks-could-pose-risks-for-healthcare-workers.html> (accessed 7 Feb 2020).
23. Reynolds DL, Garay JR, Deamond SL, Moran MK, Gold W, Styra R. Understanding, compliance and psychological impact of the SARS quarantine experience. *Epidemiol Infect* 2008; **136**(7): 997-1007.
24. National Health Commission of the People 's Republic of China. The announcement of publishing the guidelines of protection of population at different risk levels for novel coronavirus and facemasks usage to prevent the novel coronavirus infection (in Chinese). 2020. <http://www.nhc.gov.cn/jkj/s7916/202001/a3a261dabfc4c3fa365d4eb07ddab34.shtml> (accessed 7 Feb 2020).
25. Ministry of Industry and Information Technology of People 's Republic of China. Chinese medical N95 mask daily productivity is only 600,000! Forward the appeal, please leave it to the medical staff (in Chinese). 2020. <http://www.miit.gov.cn/n973401/n7647394/n7647409/c7663732/content.html> (accessed 7 Feb 2020).
26. Wu JT, Leung K, Leung GM. Nowcasting and forecasting the potential domestic and international spread of the 2019-nCoV outbreak originating in Wuhan, China: a modelling study. *Lancet* 2020.



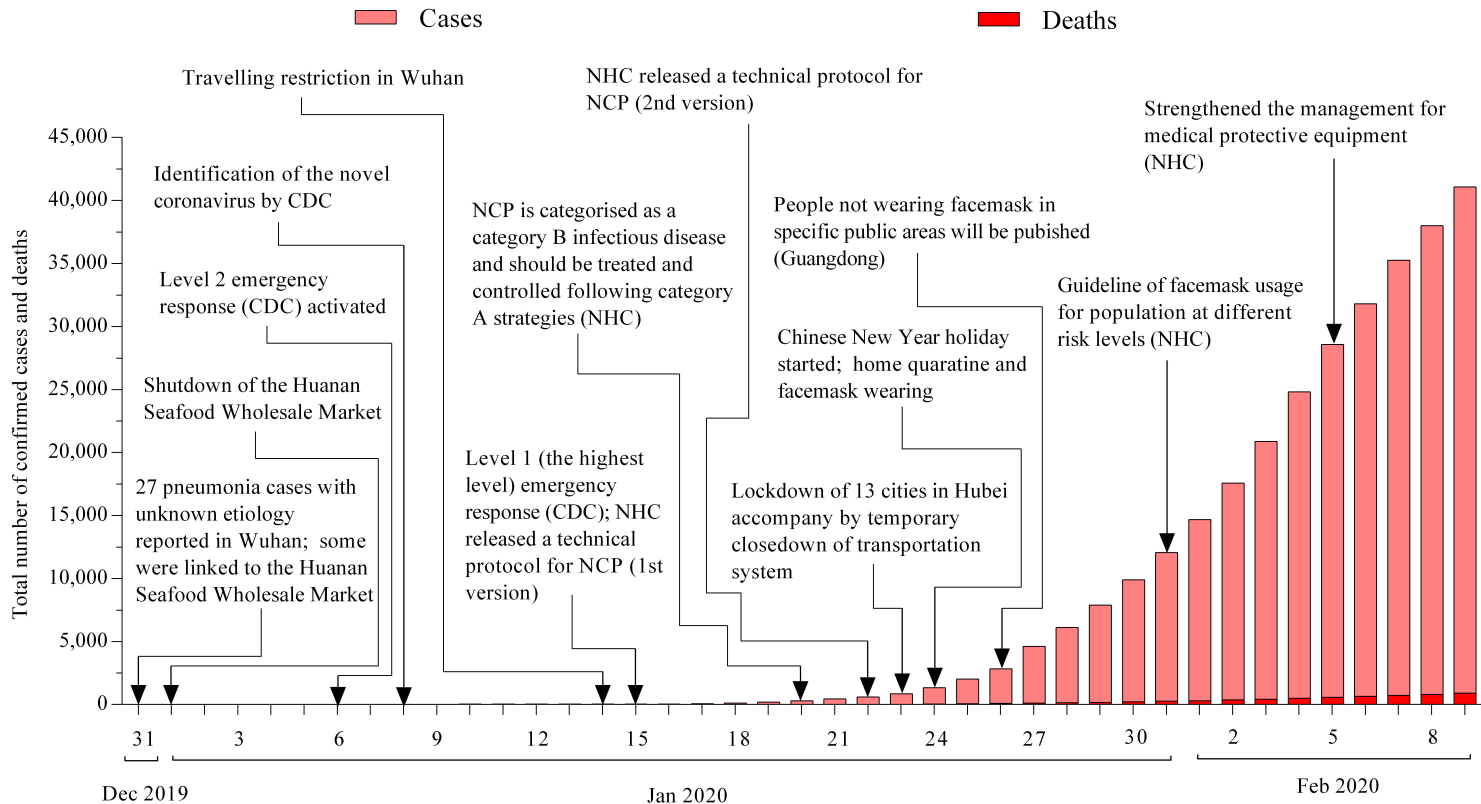

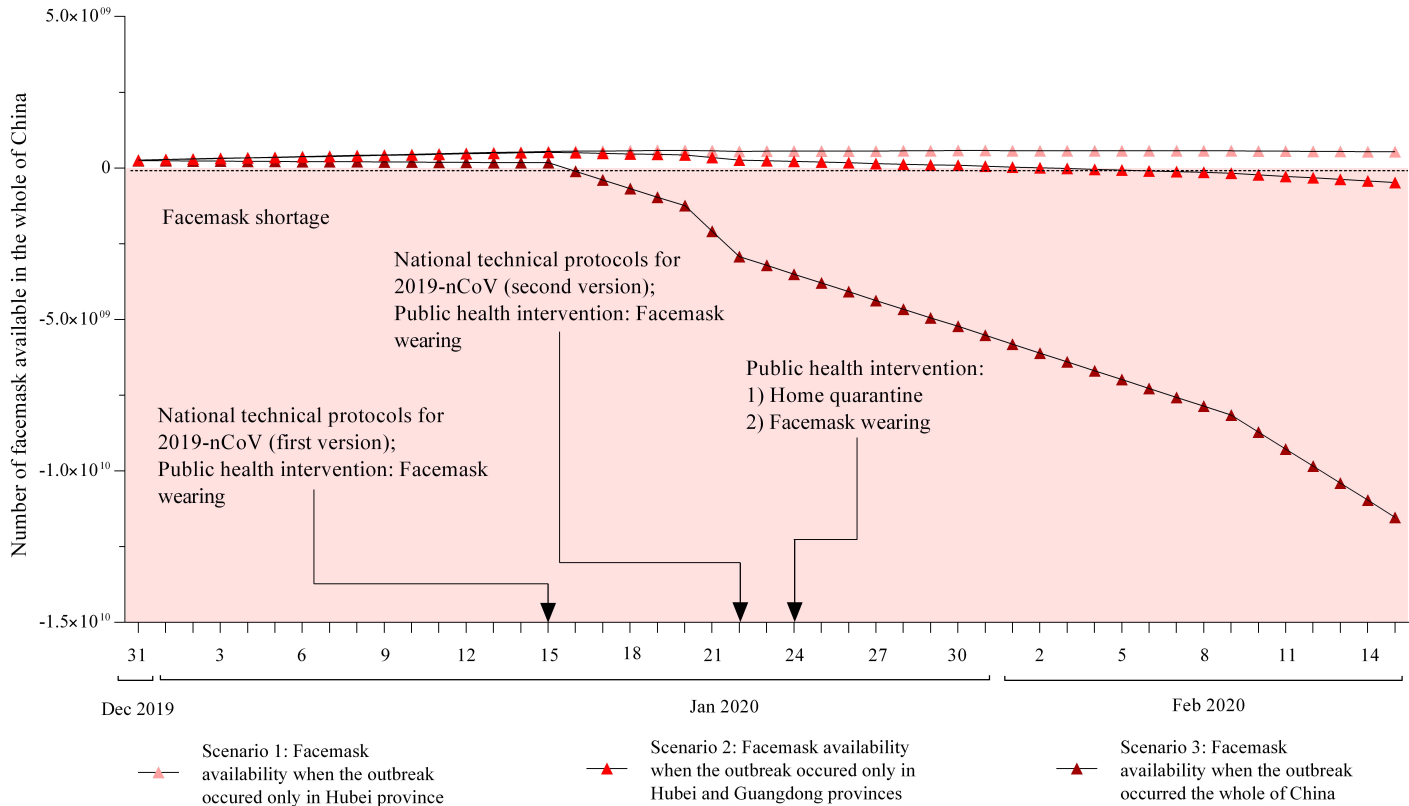

Source: https://medrxiv.org/content/10.1101/2020.02.11.20020735v1.full.pdf
